# Supplementary material for: Intestinal epithelial HDAC3 and MHC class II coordinate microbiota-specific immunity
Source: J Clin Invest. 2023 Feb 15;133(4):e162190. doi: 10.1172/JCI162190 (PMC9927950; doi:10.1172/JCI162190)
Supplement: Supplemental data [file jci-133-162190-s170.pdf]

**Supplemental Figure 1**

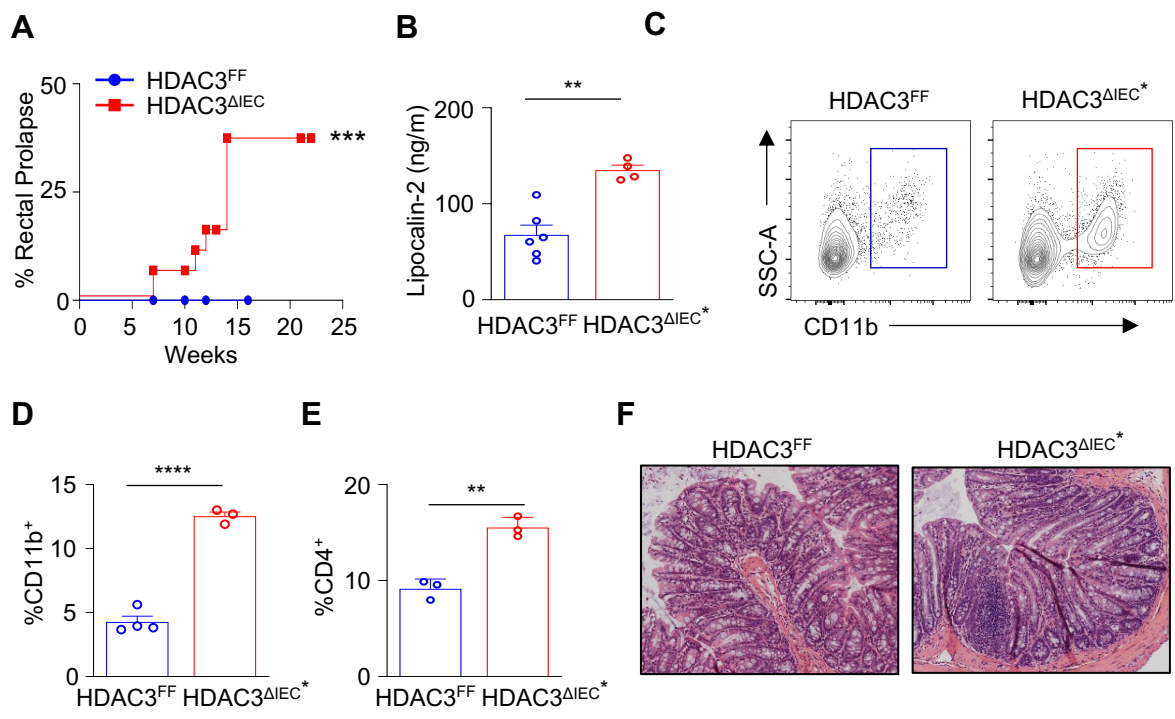

**Supplemental Fig. 1. Loss of epithelial HDAC3 expression increases spontaneous intestinal inflammation.** (A) Frequency of rectal prolapse in HDAC3<sup>FF</sup> and HDAC3<sup>ΔIEC</sup> mice. (B) Fecal concentrations of lipocalin-2. (C, D) Frequency of CD11b<sup>+</sup> myeloid cells (Gated Live, CD45<sup>+</sup>, CD3<sup>-</sup>) and (E) frequency of intestinal CD4<sup>+</sup> T cells (Gated Live, CD45<sup>+</sup>) in the large intestine of HDAC3<sup>FF</sup> and prolapse (\*) HDAC3<sup>ΔIEC</sup> mice. (F) H&E-stained colonic sections. Data represent at least three independent experiments, 3-6 mice per group. \*\*p<0.01, \*\*\*p<0.001, \*\*\*\*p<0.0001.

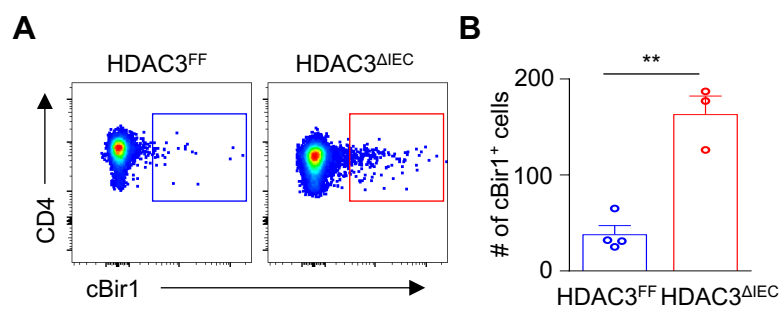

**Supplemental Fig. 2. HDAC3 regulates commensal-specific T cells in the small intestine. (A, B)** Number of cBir1<sup>+</sup> CD4<sup>+</sup> T cells in small intestine of HDAC3<sup>FF</sup> and HDAC3<sup>ΔIEC</sup>. cBir1<sup>+</sup> tetramer cells are gated on live, CD45<sup>+</sup>, lineage (CD11b, B220, Ly6G, CD11c, CD8a)<sup>-</sup>, CD4<sup>+</sup>. Data represent at least three independent experiments, 3-4 mice per group. \*\*p<0.01.

Supplemental Figure 3

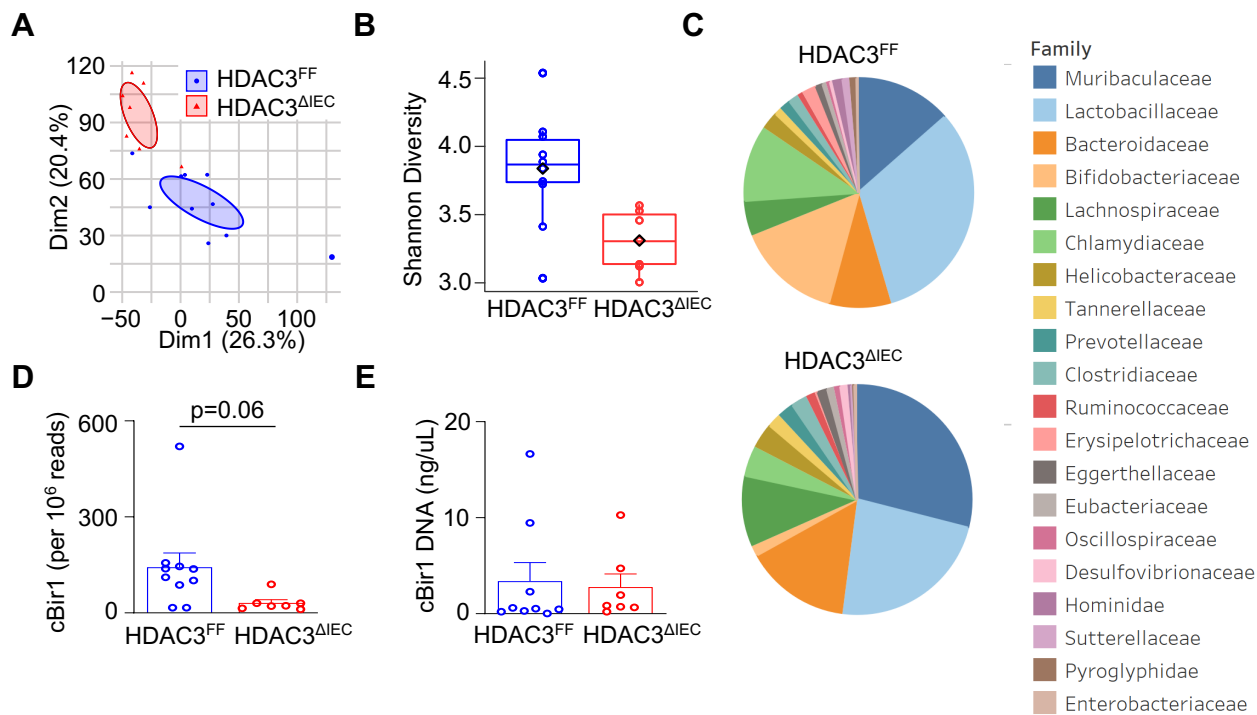

**Supplemental Fig. 3. Intestinal microbiota composition in HDAC3<sup>FF</sup> and HDAC3<sup>ΔIEC</sup> mice.** (A) PCA plot, (B) Shannon diversity, and (C) bacterial composition in HDAC3<sup>FF</sup> and HDAC3<sup>ΔIEC</sup> mice from metagenomic analyses of stool sample. (D) cBir1 counts per million reads and (E) cBir1 by qPCR in stool of HDAC3<sup>FF</sup> and HDAC3<sup>ΔIEC</sup> mice.

Supplemental Figure 4

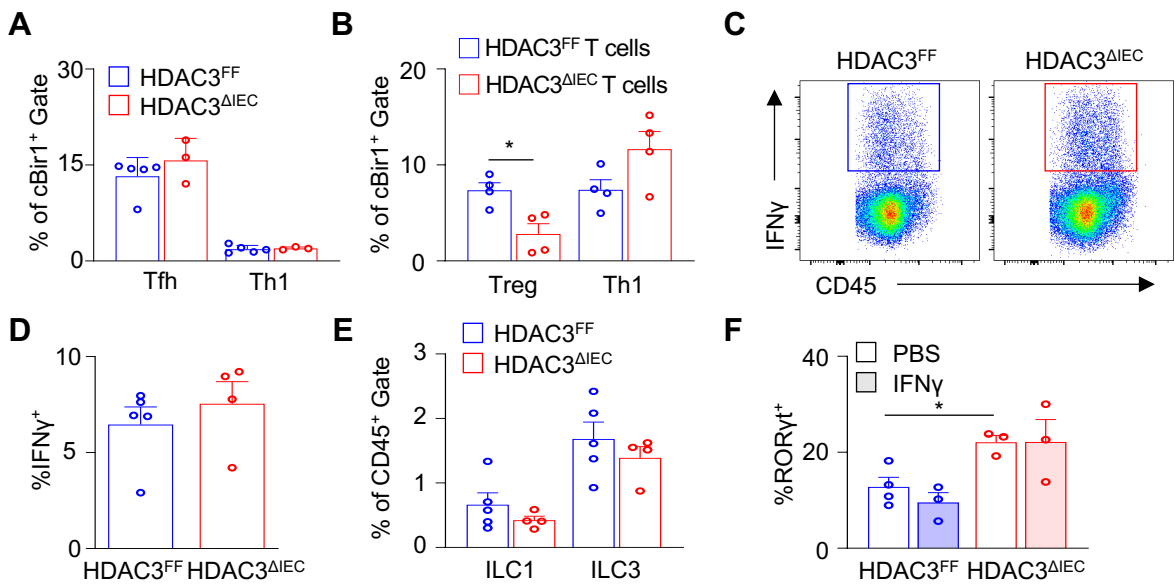

**Supplemental Fig. 4. Intestinal immune responses in HDAC3<sup>ΔIEC</sup> mice.** (A) Frequency of Th subsets of cBir1<sup>+</sup>CD4<sup>+</sup> T cells from the large intestine of HDAC3<sup>FF</sup> and HDAC3<sup>ΔIEC</sup>. (B) Frequency of Th subsets of cBir1<sup>+</sup> commensal-specific T cells following transfer into Rag1<sup>-/-</sup> mice. cBir1<sup>+</sup> tetramer cells are gated on live, CD45<sup>+</sup>, lineage (CD11b, B220, Ly6G, CD11c, CD8a)<sup>-</sup>, CD4<sup>+</sup>. T follicular (Tfh) cells gated cBir1<sup>+</sup>, FoxP3<sup>-</sup>, CXCR5<sup>+</sup>; Th1 cells gated cBir1<sup>+</sup>, FoxP3<sup>-</sup>, CXCR5<sup>-</sup>, RORγt<sup>+</sup>, Tbet<sup>+</sup>. (C, D) Frequency of IFNγ<sup>+</sup> CD45<sup>+</sup> cells and (E) frequency of ILC1s and ILC3s in large intestine of HDAC3<sup>FF</sup> and HDAC3<sup>ΔIEC</sup> mice at steady state. (F) Frequency of RORγt<sup>+</sup> cBir1<sup>+</sup> cells in intestine of HDAC3<sup>FF</sup> and HDAC3<sup>ΔIEC</sup> mice treated with PBS or IFNγ. Data represent at least two independent experiments, 3-5 mice per group. \*p<0.05.

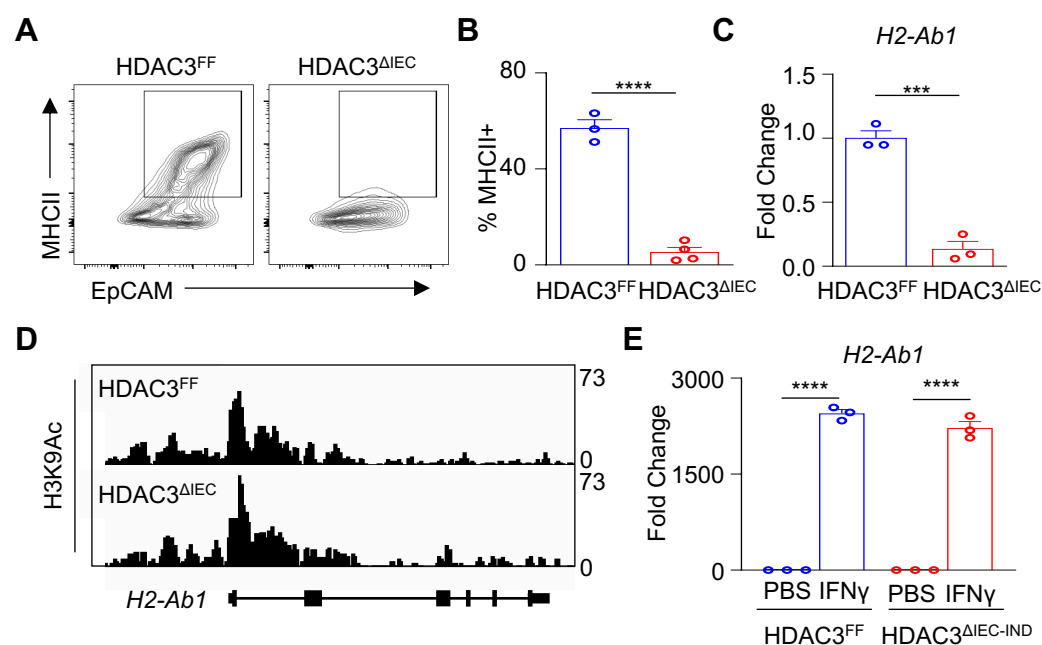

**Supplemental Fig. 5. Histone acetylation and IFN $\gamma$  induction of *H2-Ab1* are not significantly altered in IECs lacking HDAC3.** (A, B) Frequency of MHCII<sup>+</sup> IECs from small intestine of HDAC3<sup>FF</sup> and HDAC3<sup>ΔIEC</sup> mice. (C) *H2-Ab1* mRNA expression in small intestinal IECs from HDAC3<sup>FF</sup> and HDAC3<sup>ΔIEC</sup> mice. (D) ChIP-seq for H3K9Ac in primary IECs isolated from the large intestine. (E) *H2-Ab1* mRNA expression in HDAC3<sup>FF</sup> and HDAC3<sup>ΔIEC-IND</sup> organoids treated with PBS or IFN $\gamma$ . Data are representative of at least two independent experiments, 3-4 mice per group. \*\*\*p<0.001, \*\*\*\*p<0.0001.

Supplemental Figure 6

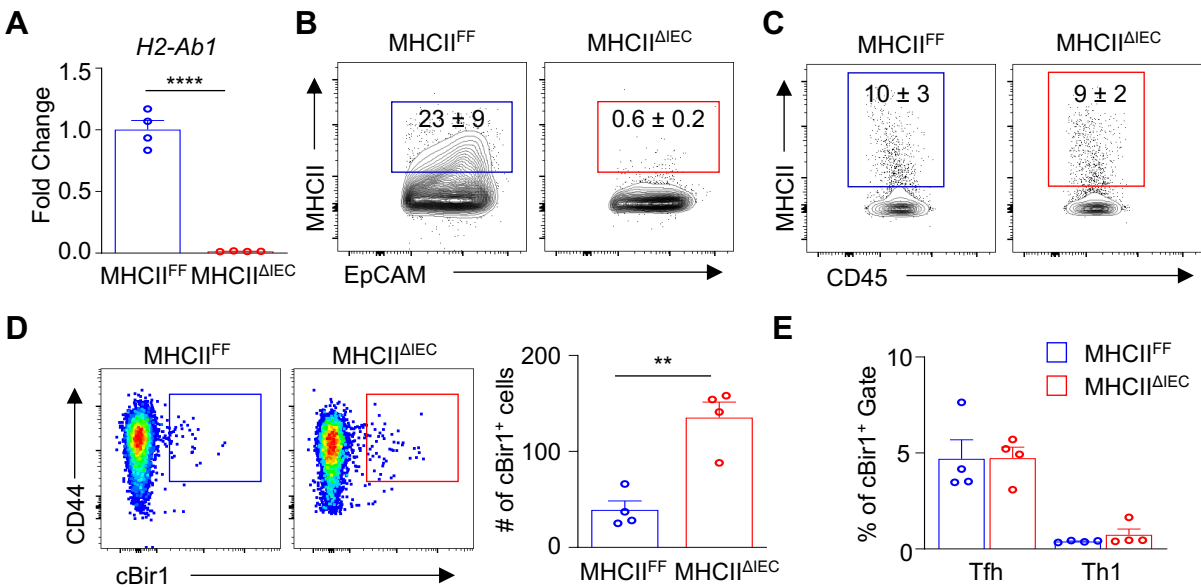

**Supplemental Fig. 6. Confirmation of IEC-specific depletion of MHCII.** (A) *H2-Ab1* mRNA expression in IECs isolated from the large intestine of MHCII<sup>FF</sup> and MHCII<sup>ΔIEC</sup> mice. (B) Surface MHCII expression in EpCAM<sup>+</sup>, CD45<sup>-</sup> cells from MHCII<sup>FF</sup> and MHCII<sup>ΔIEC</sup> mice. (C) Surface MHCII expression in EpCAM<sup>-</sup>, CD45<sup>+</sup> cells from MHCII<sup>FF</sup> and MHCII<sup>ΔIEC</sup> mice. (D) Number of cBir1<sup>+</sup> CD4<sup>+</sup> T cells in small intestine of MHCII<sup>FF</sup> and MHCII<sup>ΔIEC</sup> mice. (E) Frequency of Th subsets of cBir1<sup>+</sup>CD4<sup>+</sup> T cells from colon of MHCII<sup>FF</sup> and MHCII<sup>ΔIEC</sup> mice. cBir1<sup>+</sup> tetramer cells are gated on live, CD45<sup>+</sup>, lineage (CD11b, B220, Ly6G, CD11c, CD8a)<sup>-</sup>, CD4<sup>+</sup>. T follicular (Tfh) cells gated cBir1<sup>+</sup>, FoxP3<sup>-</sup>, CXCR5<sup>+</sup>; Th1 cells gated cBir1<sup>+</sup>, FoxP3<sup>-</sup>, CXCR5<sup>-</sup>, RORγt<sup>+</sup>, Tbet<sup>+</sup>. Data represent at least three independent experiments, 3-4 mice per group. \*\*p<0.01, \*\*\*\*p<0.0001

Supplemental Figure 7

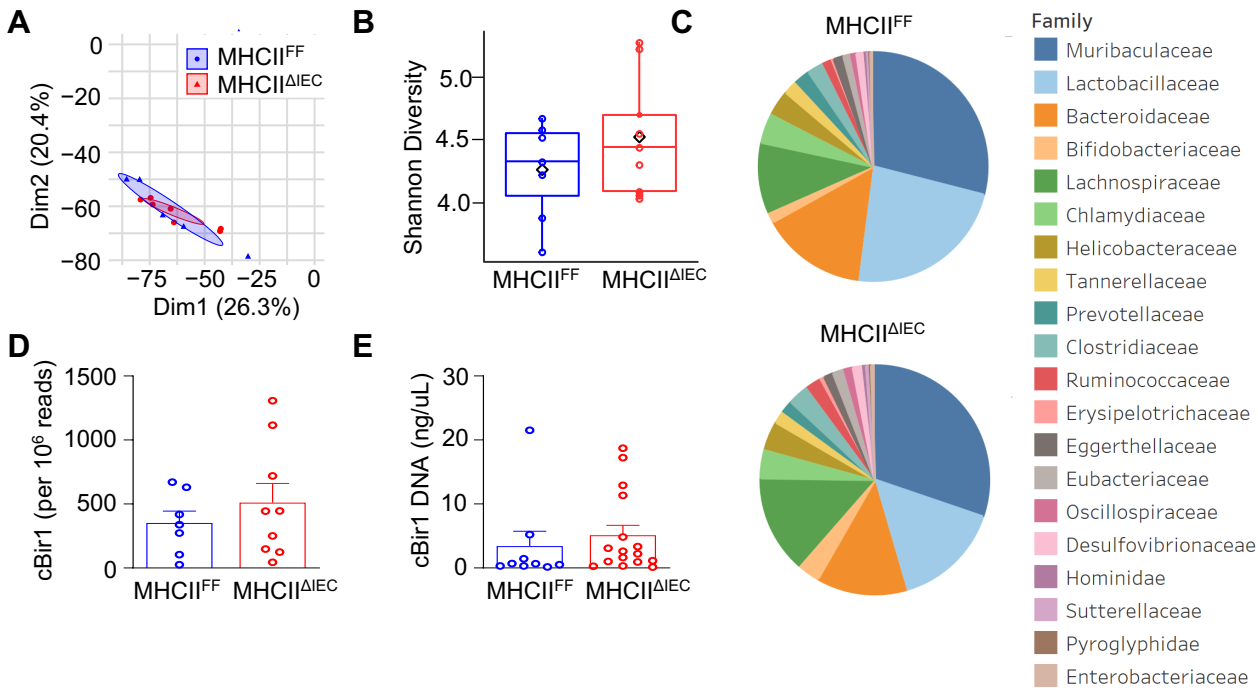

**Supplemental Fig. 7. Intestinal microbiota composition in  $MHCII^{FF}$  and  $MHCII^{\Delta IEC}$  mice.** (A) PCA plot, (B) Shannon diversity, and (C) bacterial composition in  $MHCII^{FF}$  and  $MHCII^{\Delta IEC}$  mice from metagenomic analyses of stool sample. (D) cBir1 counts per million reads and (E) cBir1 by qPCR in stool of in  $MHCII^{FF}$  and  $MHCII^{\Delta IEC}$  mice.

Supplemental Figure 8

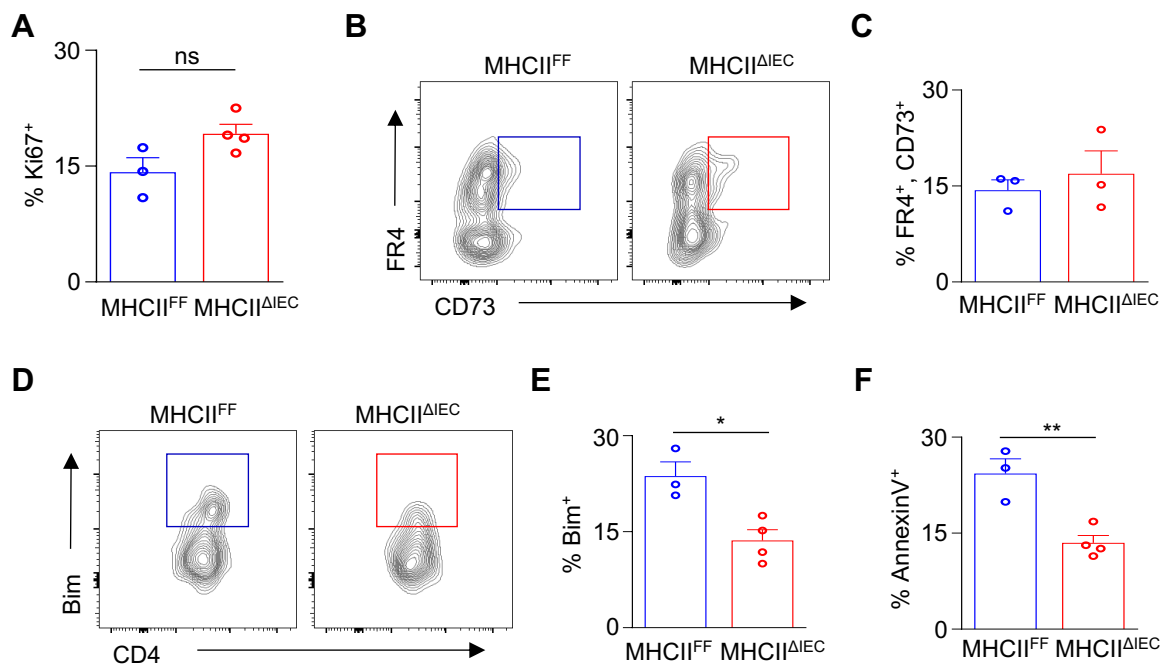

**Supplemental Fig. 8. Commensal-specific CD4<sup>+</sup> T cells from MHCII<sup>ΔIEC</sup> mice exhibit reduced markers of apoptosis.** (A) Frequency of Ki67<sup>+</sup>, (B, C) FR4<sup>+</sup>, CD73<sup>+</sup>, (D, E) Bim<sup>+</sup> in cBir1<sup>+</sup> CD4<sup>+</sup> T cells from the large intestine of MHCII<sup>FF</sup> and MHCII<sup>ΔIEC</sup> mice. (F) Frequency of AnnexinV<sup>+</sup> antigen experienced intestinal CD4<sup>+</sup> T cells from the large intestine of MHCII<sup>FF</sup> and MHCII<sup>ΔIEC</sup> mice. Data represent at least two independent experiments, 3-4 mice per group. \*p<0.05, \*\*p<0.01, ns=not significant.

Supplemental Figure 9

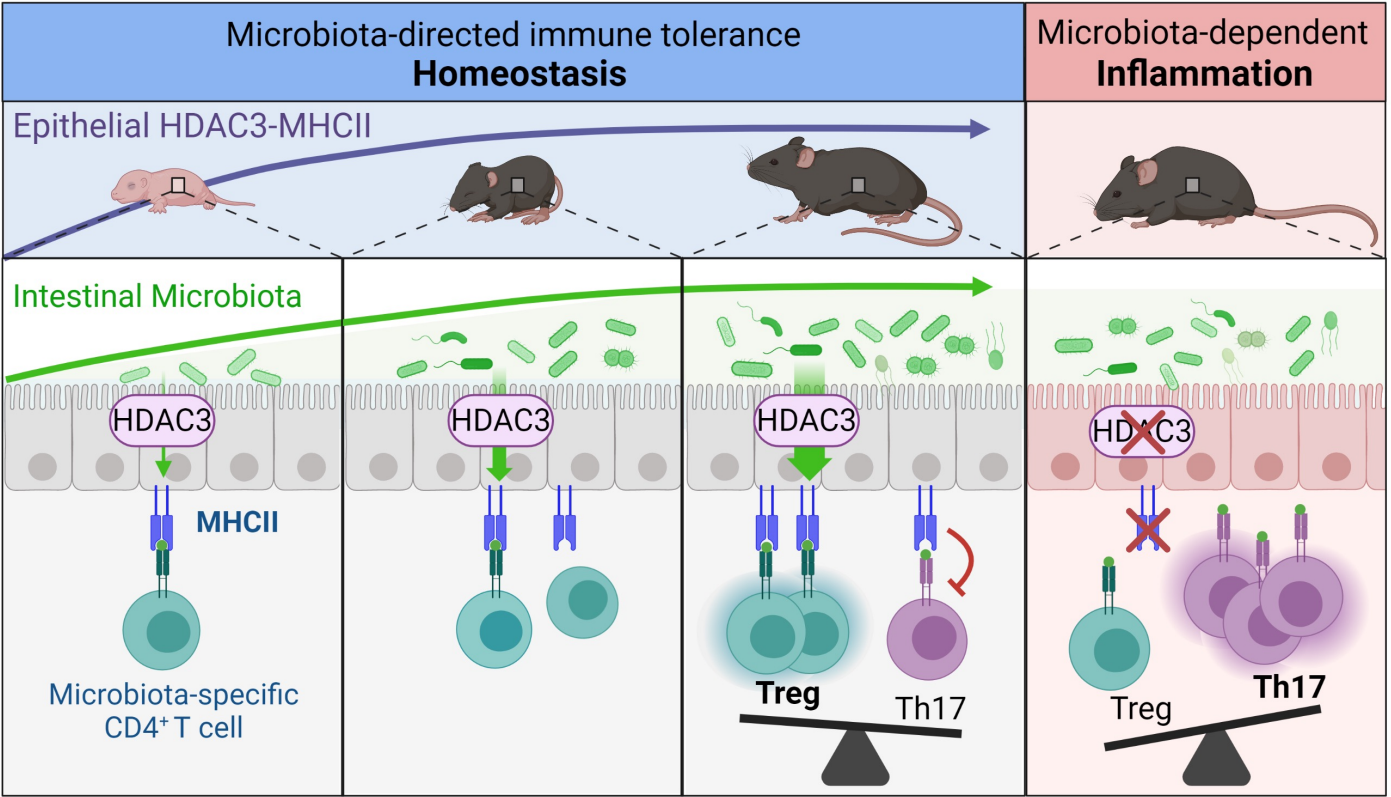

**Supplemental Fig. 9. Intestinal epithelial MHC class II regulation by HDAC3 instructs microbiota-specific CD4<sup>+</sup> T cells.** HDAC3 regulation of epithelial MHCII is activated early and concurrently with microbiota colonization. This pathway is necessary to control local accumulation of T cells that respond to commensal microbes later in life. Loss of intestinal epithelial HDAC3 results in reduced commensal-specific Tregs and an increase in commensal-specific Th17 cells. Thus, microbiota drive tolerance in the intestine by inducing an epithelial mechanism that directs local CD4<sup>+</sup> T cell subsets that recognize commensal antigens and decrease susceptibility to microbiota-sensitive inflammation. Created with Biorender.com.
